# Supplementary material
Source: publisher site journal article supplement (https://www.spandidos-publications.com/5094/downloadSupplementary)

Figure S1. Observation of morphological changes in wild-type L cells stimulated with SiSo Sup/RCAS1<sup>+</sup>. This images showed the same cells in time dependent; scale bar, 30  $\mu$ m. RCAS1, Receptor-binding cancer antigen expressed on SiSo cells.

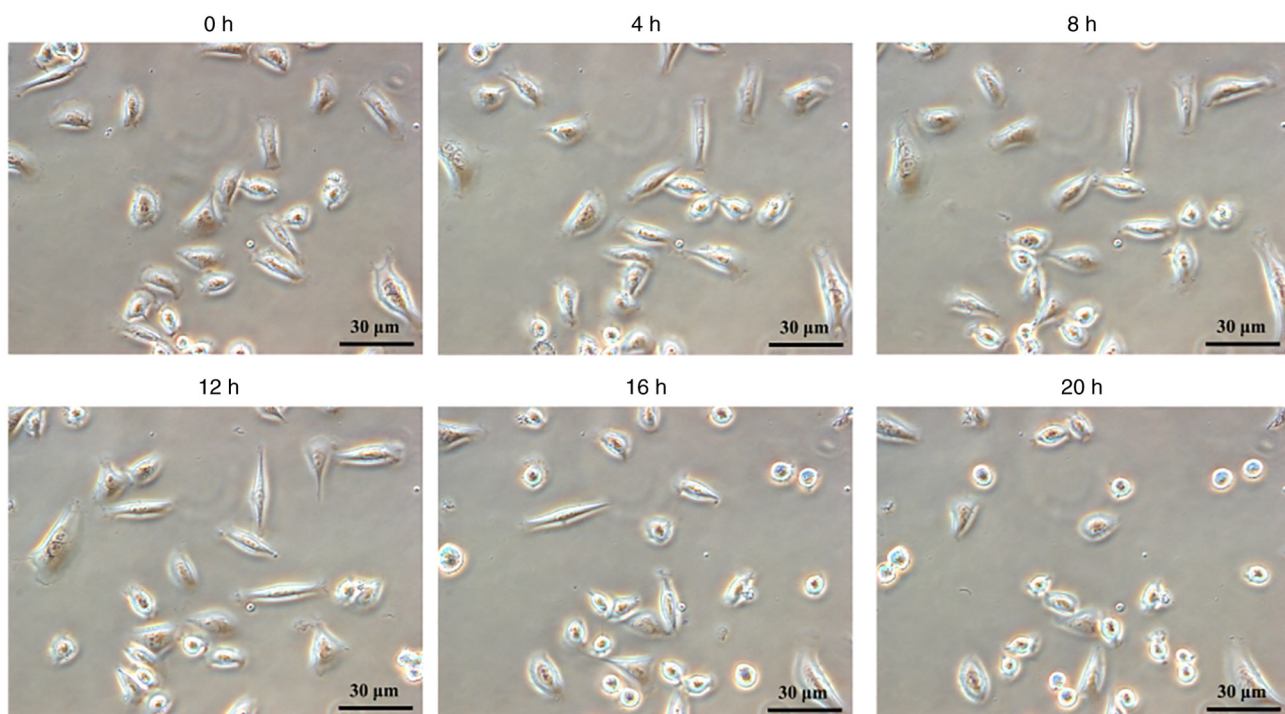

Figure S2. Cytotoxicity to wild-type L cells of Doxycycline. Results are presented as the mean  $\pm$  standard deviation of three independent experiments; \*P<0.05 vs. 0  $\mu$ g/ml.

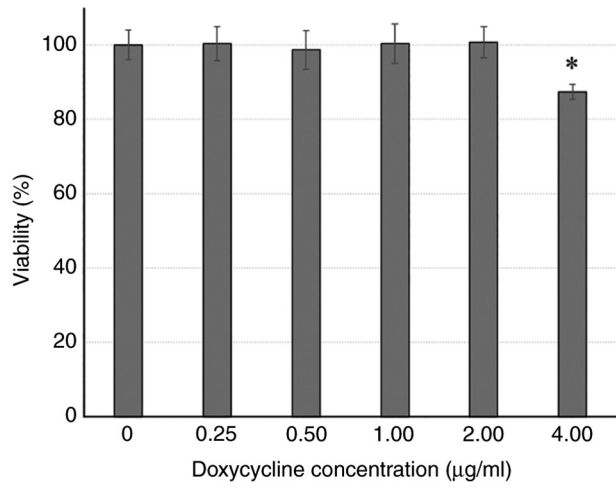

Supplement: Supplementary file 1 [file downloadSupplementary]
